# Supplementary material for: Usage Pattern and Nicotine Delivery during Ad Libitum Consumption of Pod E-Cigarettes and Heated Tobacco Products
Source: MDPI journal article supplement (doi:10.3390/toxics11050434), 2023-05-05
Supplement: s1 [file s1]

## Supplementary Material

### Usage Pattern and Nicotine Delivery during Ad Libitum Consumption of Pod E-Cigarettes and Heated Tobacco Products

**Andrea Rabenstein<sup>1,\*†</sup>, Anna Rahofer<sup>1,†</sup>, Jochen Vukas<sup>1</sup>, Benedikt Rieder<sup>1</sup>, Kristin Störzenhofecker<sup>2</sup>, Yvonne Stoll<sup>1</sup>, Nestor Burgmann<sup>1</sup>, Elke Pieper<sup>3</sup>, Peter Laux<sup>3</sup>, Andreas Luch<sup>3</sup>, Tobias Rüther<sup>1,‡</sup> and Nadja Mallock-Ohnesorg<sup>3,‡</sup>**

<sup>1</sup>Department of Psychiatry and Psychotherapy, University Hospital, Ludwig Maximilian University of Munich (LMU), Nussbaumstraße 7, 80336 Munich, Germany

<sup>2</sup>Department of Social Services, Katholische Hochschule Nordrhein-Westfalen, Standort Köln, Wörthstraße 10, 50668 Cologne, Germany

<sup>3</sup>German Federal Institute for Risk Assessment (BfR), Department of Chemical and Product Safety, Max-Dohrn-Straße 8-10, 10589 Berlin, Germany

†These authors contributed equally to this work.

‡These authors contributed equally to this work.

\*Correspondence: andrea.rabenstein@med.uni-muenchen.de

## Table of Contents

|                                                                    |    |
|--------------------------------------------------------------------|----|
| 1. Modified Questionnaires.....                                    | 2  |
| 1.1. Modified FTND .....                                           | 2  |
| 1.2. Modified QSU-G .....                                          | 3  |
| 2. Nicotine Plasma Concentrations of Individual Participants ..... | 8  |
| 3. Craving.....                                                    | 10 |
| 4. Side Effects .....                                              | 12 |

## 1. Modified Questionnaires

Modified versions of Fagerstrom Test of Nicotine Dependence (FTND) and Questionnaire on Smoking Urges (QSU-G) in German were used to fit the research question as presented below. Rephrasing of items was kept at a minimum, scoring and interpretation remained the same.

### 1.1. Modified FTND

#### a. Modified FTND for heated tobacco products:

1. Wann nach dem Aufwachen konsumieren Sie Ihren ersten Stick?
  - Innerhalb von 5 Minuten (3)
  - Nach 6-30 Minuten (2)
  - Nach 31-60 Minuten (1)
  - Nach 60 Minuten (0)
2. Finden Sie es schwierig, auf die IQOS zu verzichten, wenn es verboten ist? (z. B. im Kino, in Versammlungen usw.)
  - Ja (1)
  - Nein (0)
3. Auf welchen Stick würden Sie nicht verzichten wollen?
  - Den 1. Stick morgens (1)
  - Jeden anderen Stick (0)
4. Wie viele Sticks konsumieren Sie am Tag?
  - 0-10 (0)
  - 11-20 (1)
  - 21-30 (2)
  - 31 und mehr (3)
5. „Rauchen“ bzw. konsumieren Sie am Morgen im Allgemeinen mehr als am Rest des Tages?
  - Ja (1)
  - Nein (0)
6. Kommt es vor, dass Sie IQOS nutzen, wenn Sie krank sind und tagsüber im Bett bleiben müssen?
  - Ja (1)
  - Nein (0)

---

**Gesamtpunktzahl: [ \_ I \_ ]**

FTND: 0-2 geringe, 3-4 mittlere, 5-6 starke, 7-10 sehr starke körperliche Abhängigkeit

HSI: 0-2 geringe, 3-4 mittlere, 5-6 starke körperliche Abhängigkeit

## b. Modified FTND for pod e-cigarettes

1. Wie schnell nach dem Aufwachen dampfen Sie zum ersten Mal?
  - innerhalb von 5 Minuten (3)
  - 6-30 Minuten (2)
  - 31-60 Minuten (1)
  - nach 60 Minuten (0)
2. Finden Sie es schwierig, auf das Dampfen zu verzichten, wenn es verboten ist?
  - Ja (1)
  - Nein (0)
3. Wann fällt es Ihnen besonders schwer auf das Dampfen zu verzichten?
  - Das erste Mal dampfen am Morgen (1)
  - jedes andere Mal (0)
4. Wie viele Pods (18mg/ml Nikotin | 0,7ml | 12,6mg Nikotin) dampfen Sie am Tag?
  - 0 - 0,5 (0)
  - 0,5 - 1 (1)
  - 1 - 1,5 (2)
  - 1,5 und mehr (3)
5. Dampfen Sie stärker in den ersten Stunden nach dem Aufstehen als während des übrigen Tages?
  - Ja (1)
  - Nein (0)
6. Dampfen Sie auch, wenn Sie so krank sind, dass Sie im Bett liegen müssen?
  - Ja (1)
  - Nein (0)

---

Gesamtpunktzahl: [ \_ ]

FTND: 0-2 geringe, 3-4 mittlere, 5-6 starke, 7-10 sehr starke körperliche Abhängigkeit

HSI: 0-2 geringe, 3-4 mittlere, 5-6 starke körperliche Abhängigkeit

## 1.2. Modified QSU-G

### a. Modified QSU-G for heated tobacco products:

Bitte kennzeichnen Sie die für Sie zutreffende Einschätzung mit einem Kreis.

Bitte achte Sie auf Verneinungen durch das Wort „nicht“.

|                                          | Stimmt<br>Überhaupt<br>nicht |   |   |   |   |   | stimmt<br>völlig |
|------------------------------------------|------------------------------|---|---|---|---|---|------------------|
| 1. Eine IQOS zu nutzen würde mir jetzt   | 1                            | 2 | 3 | 4 | 5 | 6 | 7                |
| dazu verhelfen, mich sehr gut zu fühlen. |                              |   |   |   |   |   |                  |

- |                                                                                              |   |   |   |   |   |   |   |
|----------------------------------------------------------------------------------------------|---|---|---|---|---|---|---|
| 2. Ich wäre weniger reizbar, wenn ich jetzt eine IQOS nutzen könnte.                         | 1 | 2 | 3 | 4 | 5 | 6 | 7 |
| 3. Nichts wäre besser, als jetzt eine IQOS zu nutzen.                                        | 1 | 2 | 3 | 4 | 5 | 6 | 7 |
| 4. Mir fehlt die IQOS jetzt gerade <b>nicht</b> .                                            | 1 | 2 | 3 | 4 | 5 | 6 | 7 |
| 5. Ich werde eine IQOS nutzen, sobald ich wieder die Möglichkeit dazu bekomme.               | 1 | 2 | 3 | 4 | 5 | 6 | 7 |
| 6. Ich möchte jetzt <b>nicht</b> IQOS nutzen.                                                | 1 | 2 | 3 | 4 | 5 | 6 | 7 |
| 7. Eine IQOS würde meine schlechte Stimmung deutlich verbessern.                             | 1 | 2 | 3 | 4 | 5 | 6 | 7 |
| 8. Eine IQOS würde mir jetzt <b>nicht</b> helfen, mich zu beruhigen.                         | 1 | 2 | 3 | 4 | 5 | 6 | 7 |
| 9. Wenn ich jetzt eine IQOS angeboten bekomme, würde ich sie sofort verwenden.               | 1 | 2 | 3 | 4 | 5 | 6 | 7 |
| 10. Ich könnte ab sofort für eine lange Zeit auf das Verwenden von IQOS verzichten.          | 1 | 2 | 3 | 4 | 5 | 6 | 7 |
| 11. Jetzt eine IQOS zu nutzen, wäre <b>nicht</b> angenehm.                                   | 1 | 2 | 3 | 4 | 5 | 6 | 7 |
| 12. Wenn ich jetzt im Moment eine IQOS würde nutzen, wäre ich weniger gelangweilt.           | 1 | 2 | 3 | 4 | 5 | 6 | 7 |
| 13. Das Einzige, was ich jetzt gerne hätte, wäre eine IQOS.                                  | 1 | 2 | 3 | 4 | 5 | 6 | 7 |
| 14. Wenn ich jetzt eine IQOS nutzen würde, würde ich mich weniger müde fühlen.               | 1 | 2 | 3 | 4 | 5 | 6 | 7 |
| 15. Jetzt einen Stick zu konsumieren würde mich glücklicher machen.                          | 1 | 2 | 3 | 4 | 5 | 6 | 7 |
| 16. Sogar, wenn es jetzt möglich wäre, würde ich IQOS wahrscheinlich <b>nicht</b> verwenden. | 1 | 2 | 3 | 4 | 5 | 6 | 7 |

17. Ich habe jetzt gerade keinen Wunsch nach IQOS. 1 2 3 4 5 6 7
18. Mein Wunsch nach einer IQOS scheint gerade so stark zu sein, dass er mich zu überwältigen droht. 1 2 3 4 5 6 7
19. Wenn ich jetzt eine IQOS nutzen würde, erschiene mir fast alles in Ordnung. 1 2 3 4 5 6 7
20. Ich sehne mich gerade nach einer IQOS. 1 2 3 4 5 6 7
21. Ich würde eine IQOS jetzt **nicht** genießen. 1 2 3 4 5 6 7
22. Eine IQOS würde jetzt **nicht** gut schmecken. 1 2 3 4 5 6 7
23. Ich verspüre jetzt gerade den Drang nach einer IQOS. 1 2 3 4 5 6 7
24. Ich hätte die Dinge gerade besser im Griff, wenn ich eine IQOS nutzen würde. 1 2 3 4 5 6 7
25. Ich werde eine IQOS nutzen, sobald ich die Möglichkeit dazu habe. 1 2 3 4 5 6 7
26. Ich würde mich körperlich **nicht** besser fühlen, wenn ich jetzt einen Stick konsumieren würde. 1 2 3 4 5 6 7
27. Eine IQOS wäre jetzt **nicht** sehr befriedigend. 1 2 3 4 5 6 7
28. Wenn ich jetzt eine IQOS in der Hand hätte, würde ich sie wahrscheinlich gar **nicht** nutzen. 1 2 3 4 5 6 7
29. Wenn ich jetzt einen Stick konsumieren würde, könnte ich klarer denken. 1 2 3 4 5 6 7
30. Ich würde fast alles tun, um jetzt eine IQOS zu bekommen. 1 2 3 4 5 6 7
31. Ich muss jetzt einen Stick konsumieren. 1 2 3 4 5 6 7
32. Gerade jetzt habe ich **nicht** vor eine IQOS zu nutzen. 1 2 3 4 5 6 7

### a. Modified QSU-G for pod e-cigarettes

Bitte kennzeichnen Sie die für Sie zutreffende Einschätzung mit einem Kreis.  
Bitte achte Sie auf Verneinungen durch das Wort „nicht“.

|                                                                                         | Stimmt<br>Überhaupt<br>nicht |   |   |   |   |   | stimmt<br>völlig |
|-----------------------------------------------------------------------------------------|------------------------------|---|---|---|---|---|------------------|
| 1. Eine E-Zigarette zu dampfen würde mir jetzt dazu verhelfen, mich sehr gut zu fühlen. | 1                            | 2 | 3 | 4 | 5 | 6 | 7                |
| 2. Ich wäre weniger reizbar, wenn ich jetzt eine E-Zigarette dampfen könnte.            | 1                            | 2 | 3 | 4 | 5 | 6 | 7                |
| 3. Nichts wäre besser, als jetzt eine E-Zigarette zu dampfen.                           | 1                            | 2 | 3 | 4 | 5 | 6 | 7                |
| 4. Mir fehlt das Dampfen jetzt gerade <b>nicht</b> .                                    | 1                            | 2 | 3 | 4 | 5 | 6 | 7                |
| 5. Ich werde eine E-Zigarette dampfen, sobald ich wieder die Möglichkeit dazu bekomme.  | 1                            | 2 | 3 | 4 | 5 | 6 | 7                |
| 6. Ich möchte jetzt <b>nicht</b> dampfen.                                               | 1                            | 2 | 3 | 4 | 5 | 6 | 7                |
| 7. Eine E-Zigarette würde meine schlechte Stimmung deutlich verbessern.                 | 1                            | 2 | 3 | 4 | 5 | 6 | 7                |
| 8. Eine E-Zigarette würde mir jetzt <b>nicht</b> helfen, mich zu beruhigen.             | 1                            | 2 | 3 | 4 | 5 | 6 | 7                |
| 9. Wenn ich jetzt eine E-Zigarette angeboten bekomme, würde ich sie sofort dampfen.     | 1                            | 2 | 3 | 4 | 5 | 6 | 7                |
| 10. Ich könnte ab sofort für eine lange Zeit auf das Dampfen verzichten.                | 1                            | 2 | 3 | 4 | 5 | 6 | 7                |
| 11. Jetzt eine E-Zigarette zu dampfen, wäre <b>nicht</b> angenehm.                      | 1                            | 2 | 3 | 4 | 5 | 6 | 7                |
| 12. Wenn ich jetzt im Moment dampfen würde, wäre ich weniger gelangweilt.               | 1                            | 2 | 3 | 4 | 5 | 6 | 7                |

13. Das Einzige, was ich jetzt gerne hätte, wäre eine E-Zigarette. 1 2 3 4 5 6 7
14. Wenn ich jetzt eine E-Zigarette dampfen würde, würde ich mich weniger müde fühlen. 1 2 3 4 5 6 7
15. Jetzt zu dampfen, würde mich glücklicher machen. 1 2 3 4 5 6 7
16. Sogar, wenn es jetzt möglich wäre, würde ich wahrscheinlich **nicht** dampfen. 1 2 3 4 5 6 7
17. Ich habe jetzt gerade keinen Wunsch nach einer E-Zigarette. 1 2 3 4 5 6 7
18. Mein Wunsch nach einer E-Zigarette scheint geradeso stark zu sein, dass er mich zu überwältigen droht. 1 2 3 4 5 6 7
19. Wenn ich jetzt eine E-Zigarette dampfen würde, erschiene mir fast alles in Ordnung. 1 2 3 4 5 6 7
20. Ich sehne mich gerade nach einer E-Zigarette. 1 2 3 4 5 6 7
21. Ich würde eine E-Zigarette jetzt **nicht** genießen. 1 2 3 4 5 6 7
22. Eine E-Zigarette würde jetzt **nicht** gut schmecken. 1 2 3 4 5 6 7
23. Ich verspüre jetzt gerade den Drang nach einer E-Zigarette. 1 2 3 4 5 6 7
24. Ich hätte die Dinge gerade besser im Griff, wenn ich eine E-Zigarette dampfen würde. 1 2 3 4 5 6 7
25. Ich werde eine E-Zigarette dampfen, sobald ich die Möglichkeit dazu habe. 1 2 3 4 5 6 7
26. Ich würde mich körperlich **nicht** besser fühlen, wenn ich jetzt dampfen würde. 1 2 3 4 5 6 7

27. Eine E-Zigarette wäre jetzt **nicht** sehr befriedigend. 1 2 3 4 5 6 7
28. Wenn ich jetzt eine E-Zigarette in der Hand hätte, würde ich sie wahrscheinlich gar **nicht** dampfen. 1 2 3 4 5 6 7
29. Wenn ich jetzt eine dampfen würde, könnte ich klarer denken. 1 2 3 4 5 6 7
30. Ich würde fast alles tun, um jetzt eine E-Zigarette zu bekommen. 1 2 3 4 5 6 7
31. Ich muss jetzt eine E-Zigarette dampfen. 1 2 3 4 5 6 7
32. Gerade jetzt habe ich **nicht** vor zu dampfen. 1 2 3 4 5 6 7

## 2. Nicotine Plasma Concentrations of Individual Participants

Nicotine plasma concentrations at the different time points are listed in Tables S1 (for the pod e-cigarette group), S2 (for the HTP group), and S3 (for the conventional cigarette group).

**Table S1.** Nicotine plasma concentrations of individual participants before baseline correction in the pod e-cigarette group with their nicotine metabolic ratios (NMR).

| Participant  | NMR  | 0 min | 5 min | 10 min | 15 min | 30 min | 45 min | 60 min | 75 min | 90 min |
|--------------|------|-------|-------|--------|--------|--------|--------|--------|--------|--------|
| Pod e-cig 1  | 0.33 | 0.9   | 5.0   | 6.0    | 6.2    | 8.3    | 10.8   | 13.2   | 14.1   | 13.7   |
| Pod e-cig 2  | 0.47 | 0.4   | 1.7   | 3.1    | 3.4    | 5.4    | 8.6    | 10.3   | 13.3   | 15.7   |
| Pod e-cig 3  | 0.42 | 0.5   | 3.9   | 5.0    | 4.2    | 7.4    | 6.9    | 7.4    | 7.1    | 5.3    |
| Pod e-cig 4  | 0.38 | 0.3   | 1.4   | 2.9    | 7.3    | 5.5    | 5.7    | 6.9    | 8.8    | 10.6   |
| Pod e-cig 5  | 0.64 | 0.7   | 10.4  | 14.5   | 9.2    | 13.7   | 14.3   | 14.6   | 13.9   | 14.7   |
| Pod e-cig 6  | 0.38 | 0.8   | 5.0   | 5.0    | 4.3    | 5.7    | 7.5    | 7.4    | 9.0    | 11.1   |
| Pod e-cig 7  | 0.27 | 0.9   | 8.0   | 12.8   | 13.4   | 11.2   | 12.4   | 21.7   | 24.8   | 24.2   |
| Pod e-cig 8  | 0.79 | 1.5   | 3.3   | 4.5    | 5.6    | 11.4   | 11.2   | 11.8   | 16.3   | 20.7   |
| Pod e-cig 9  | 0.20 | 0.0   | 6.8   | 6.6    | 7.4    | 5.3    | 5.4    | 4.7    | 7.6    | 8.7    |
| Pod e-cig 10 | 0.00 | 0.0   | 0.5   | 0.6    | 0.6    | 0.7    | 0.8    | 1.3    | 1.7    | 2.5    |
| Pod e-cig 11 | 0.45 | 0.3   | 4.5   | 4.7    | 8.5    | 7.7    | 7.6    | 9.2    | 10.8   | 11.7   |
| Pod e-cig 12 | 0.23 | 0.2   | 1.5   | 1.3    | 1.1    | 0.8    | 0.9    | 0.9    | 0.8    | 0.8    |
| Pod e-cig 13 | 0.46 | 0.3   | 2.6   | 1.6    | 1.7    | 2.8    | 3.1    | 3.2    | 3.5    | 3.6    |
| Pod e-cig 14 | 0.33 | 0.2   | 2.8   | 1.2    | 1.2    | 4.1    | 2.9    | 3.2    | 2.4    | 3.3    |
| Pod e-cig 15 | 0.37 | 0.5   | 2.8   | 3.3    | 3.8    | 5.4    | 5.2    | 14.1   | 8.5    | 10.2   |



**Table S2.** Nicotine plasma concentrations of individual participants before baseline correction in the heated tobacco product group with their nicotine metabolic ratios (NMR).

| Participant | NMR  | 0 min | 5 min | 10 min | 15 min | 30 min | 45 min | 60 min | 75 min | 90 min |
|-------------|------|-------|-------|--------|--------|--------|--------|--------|--------|--------|
| HTP 1       | 0.17 | 1.7   | 14.0  | 10.1   | 9.1    | 7.5    | 14.9   | 12.3   | 11.3   | 10.3   |
| HTP 2       | 0.19 | 1.6   | 6.7   | 7.4    | 8.3    | 10.9   | 8.8    | 7.6    | 12.3   | 10.3   |
| HTP 3       | 0.38 | 0.3   | 9.4   | 8.4    | 8.0    | 6.4    | 5.6    | 4.7    | 10.4   | 7.9    |
| HTP 4       | 0.40 | 0.3   | 11.2  | 8.4    | 12.4   | 9.7    | 13.5   | 10.7   | 16.1   | 11.7   |
| HTP 5       | 0.55 | 0.7   | 5.5   | 4.8    | 4.9    | 10.5   | 8.2    | 7.3    | 9.5    | 12.2   |
| HTP 6       | 0.73 | 0.0   | 6.5   | 6.1    | 5.7    | 9.2    | 16.8   | 16.0   | 14.8   | 14.0   |
| HTP 7       | 0.39 | 0.3   | 26.5  | 8.5    | 7.7    | 13.7   | 8.3    | 10.1   | 10.1   | 20.5   |
| HTP 8       | 0.32 | 1.0   | 18.7  | 10.6   | 19.2   | 10.1   | 18.8   | 22.9   | 26.1   | 29.8   |
| HTP 9       | 0.86 | 0.4   | 12.4  | 18.9   | 16.1   | 13.9   | 20.9   | 21.4   | 18.9   | 21.3   |
| HTP 10      | 0.73 | 0.6   | 10.6  | 10.7   | 13.9   | 21.6   | 13.3   | 17.1   | 14.0   | 22.5   |
| HTP 11      | 0.14 | 0.5   | 4.6   | 4.8    | 9.6    | 14.5   | 17.4   | 18.0   | 16.9   | 17.9   |
| HTP 12      | 0.21 | 1.6   | 7.9   | 8.7    | 6.8    | 14.7   | 22.0   | 24.9   | 29.8   | 35.1   |
| HTP 13      | 0.05 | 3.0   | 3.4   | 4.9    | 5.6    | 5.2    | 6.2    | 7.4    | 6.5    | 8.2    |
| HTP 14      | 0.23 | 3.5   | 10.9  | 16.6   | 15.9   | 20.6   | 18.7   | 23.7   | 23.9   | 28.0   |
| HTP 15      | 1.35 | 0.0   | 28.2  | 11.0   | 8.5    | 17.9   | 20.3   | 18.9   | 27.4   | 33.1   |

**Table S3.** Nicotine plasma concentrations of individual participants before baseline correction in the conventional cigarette group with their nicotine metabolic ratios (NMR).

| Participant | NMR  | 0 min | 5 min | 10 min | 15 min | 30 min | 45 min | 60 min | 75 min | 90 min |
|-------------|------|-------|-------|--------|--------|--------|--------|--------|--------|--------|
| CC 1        | 0.36 | 1.8   | 28.6  | 15.6   | 16.4   | 16.9   | 22.9   | 28.2   | 22.4   | 27.8   |
| CC 2        | 0.75 | 1.2   | 5.4   | 7.3    | 5.0    | 4.4    | 7.5    | 10.0   | 6.9    | 14.2   |
| CC 3        | 0.25 | 0.8   | 7.9   | 11.5   | 9.1    | 13.1   | 16.3   | 27.6   | 21.0   | 25.5   |
| CC 4        | 0.22 | 1.0   | 13.8  | 8.4    | 6.7    | 11.1   | 8.5    | 7.5    | 9.9    | 9.7    |
| CC 5        | 0.87 | 0.0   | 14.4  | 12.6   | 12.3   | 19.9   | 15.9   | 22.4   | 30.3   | 26.5   |
| CC 6        | 0.86 | 1.3   | 64.1  | 21.6   | 14.7   | 21.5   | 20.0   | 21.6   | 27.7   | 31.3   |
| CC 7        | 0.37 | 1.3   | 6.6   | 7.3    | 11.5   | 16.7   | 21.2   | 23.0   | 26.6   | 28.1   |
| CC 8        | 0.15 | 1.6   | 10.8  | 10.2   | 8.6    | 13.6   | 11.5   | 17.5   | 15.5   | 12.5   |
| CC 9        | 0.19 | 0.9   | 22.0  | 19.6   | 14.3   | 27.5   | 23.2   | 20.5   | 21.5   | 30.9   |
| CC 10       | 0.87 | 0.3   | 9.2   | 15.6   | 13.8   | 10.4   | 21.8   | 18.1   | 25.0   | 41.0   |
| CC 11       | 0.27 | 0.1   | 11.8  | 10.7   | 9.0    | 18.2   | 11.6   | 12.5   | 13.3   | 19.0   |
| CC 12       | 0.31 | 0.2   | 12.3  | 12.1   | 9.6    | 17.6   | 15.1   | 18.8   | 26.1   | 29.6   |
| CC 13       | 0.59 | 0.0   | 0.0   | 11.1   | 12.3   | 9.2    | 17.5   | 14.9   | 20.0   | 16.5   |
| CC 14       | 0.15 | 3.1   | 19.2  | 14.2   | 15.0   | 17.9   | 22.5   | 26.1   | 29.0   | 30.0   |
| CC 15       | 0.38 | 0.2   | 12.1  | 11.2   | 13.3   | 19.9   | 24.1   | 18.5   | 16.7   | 22.4   |

### 3. Craving

Acute craving at the different time points are listed in Tables S4 (for the pod e-cigarette group), S5 (for the HTP group), and S6 (for the conventional cigarette group).

**Table S4.** Acute craving in the pod e-cigarette group (single question answered on a scale from 1 to 7) over the study period per participant.

| Participant  | 0 min | 5 min | 10 min | 15 min | 30 min | 45 min | 60 min | 75 min | 90 min |
|--------------|-------|-------|--------|--------|--------|--------|--------|--------|--------|
| Pod e-cig 1  | 5     | 6     | 6      | 5      | 5      | 4      | 3      | 1      | 1      |
| Pod e-cig 2  | 4     | 4     | 4      | 4      | 4      | 5      | 4      | 5      | 5      |
| Pod e-cig 3  | 7     | 7     | 4      | 2      | 2      | 1      | 1      | 1      | 1      |
| Pod e-cig 4  | 4     | 4     | 3      | 2      | 2      | 2      | 2      | 2      | 1      |
| Pod e-cig 5  | 6     | 5     | 5      | 5      | 5      | 4      | 4      | 3      | 2      |
| Pod e-cig 6  | 6     | 4     | 4      | 1      | 1      | 1      | 1      | 1      | 1      |
| Pod e-cig 7  | 5     | 3     | 3      | 3      | 3      | 3      | 2      | 2      | 2      |
| Pod e-cig 8  | 6     | 4     | 3      | 2      | 1      | 1      | 1      | 1      | 1      |
| Pod e-cig 9  | 7     | 4     | 3      | 3      | 1      | 2      | 2      | 1      | 2      |
| Pod e-cig 10 | 5     | 5     | 3      | 4      | 3      | 2      | 4      | 2      | 2      |
| Pod e-cig 11 | 2     | 2     | 2      | 2      | 2      | 2      | 2      | 2      | 2      |
| Pod e-cig 12 | 5     | 5     | 6      | 6      | 4      | 4      | 5      | 4      | 3      |
| Pod e-cig 13 | 6     | 6     | 4      | 4      | 4      | 5      | 5      | 5      | 6      |
| Pod e-cig 14 | 5     | 5     | 5      | 4      | 4      | 4      | 4      | 4      | 4      |
| Pod e-cig 15 | 6     | 4     | 3      | 4      | 4      | 5      | 4      | 3      | 3      |
| Mean         | 5,3   | 4,5   | 3,9    | 3,4    | 3,0    | 3,0    | 2,9    | 2,5    | 2,4    |

**Table S5.** Acute craving in the HTP group (single question answered on a scale from 1 to 7) over the study period per participant.

| Participant | 0 min | 5 min | 10 min | 15 min | 30 min | 45 min | 60 min | 75 min | 90 min |
|-------------|-------|-------|--------|--------|--------|--------|--------|--------|--------|
| HTP 1       | 4     | 2     | 1      | 1      | 1      | 1      | 1      | 1      | 1      |
| HTP 2       | 7     | 3     | 5      | 4      | 1      | 2      | 5      | 1      | 2      |
| HTP 3       | 7     | 3     | 1      | 1      | 2      | 4      | 5      | 1      | 1      |
| HTP 4       | 3     | 3     | 3      | 3      | 2      | 1      | 3      | 1      | 2      |
| HTP 5       | 6     | 2     | 2      | 3      | 1      | 2      | 4      | 7      | 3      |
| HTP 6       | 5     | 1     | 3      | 3      | 1      | 5      | 1      | 1      | 1      |
| HTP 7       | 7     | 2     | 2      | 3      | 1      | 3      | 1      | 2      | 1      |
| HTP 8       | 7     | 3     | 6      | 5      | 3      | 2      | 1      | 2      | 1      |
| HTP 9       | 7     | 2     | 1      | 1      | 3      | 2      | 1      | 2      | 1      |
| HTP 10      | 7     | 5     | 4      | 3      | 2      | 4      | 3      | 3      | x      |
| HTP 11      | 7     | 6     | 5      | 2      | 1      | 4      | 1      | 2      | 3      |
| HTP 12      | 6     | 1     | 1      | 2      | 1      | 2      | 2      | 1      | 1      |
| HTP 13      | 5     | 1     | 1      | 1      | 3      | 1      | 2      | 5      | 1      |
| HTP 14      | 6     | 6     | 2      | 4      | 2      | 4      | 2      | 5      | 1      |
| HTP 15      | 4     | 1     | 2      | 3      | 3      | 4      | 2      | 2      | 1      |
| Mean        | 5,9   | 2,7   | 2,6    | 2,6    | 1,8    | 2,7    | 2,3    | 2,4    | 1,4    |

**Table S6.** Acute craving in the cigarette group (single question answered on a scale from 1 to 7) over the study period per participant.

| Participant | 0 min | 5 min | 10 min | 15 min | 30 min | 45 min | 60 min | 75 min | 90 min |
|-------------|-------|-------|--------|--------|--------|--------|--------|--------|--------|
| CC 1        | 6     | 4     | 4      | 1      | 5      | 4      | 2      | 4      | 4      |
| CC 2        | 6     | 2     | 2      | 2      | 4      | 2      | 2      | 3      | 1      |
| CC 3        | 3     | 6     | 1      | 3      | 2      | 2      | 1      | 4      | 2      |
| CC 4        | 7     | 1     | 1      | 1      | 1      | 1      | 2      | 1      | 1      |
| CC 5        | 7     | 1     | 3      | 3      | 1      | 1      | 1      | 5      | 2      |
| CC 6        | 7     | 4     | 3      | 2      | 2      | 3      | 2      | 2      | 2      |
| CC 7        | 6     | 4     | 5      | 5      | 2      | 3      | 3      | 3      | 1      |
| CC 8        | 7     | 1     | 1      | 1      | 1      | 2      | 1      | 1      | 1      |
| CC 9        | 6     | 1     | 1      | 3      | 2      | 3      | 1      | 2      | 3      |
| CC 10       | 6     | 1     | 2      | 3      | 4      | 2      | 3      | 1      | 2      |
| CC 11       | 5     | 1     | 1      | 3      | 1      | 3      | 1      | 1      | 2      |
| CC 12       | 5     | 2     | 1      | 1      | 1      | 1      | 1      | 1      | 1      |
| CC 13       | 5     | 6     | 1      | 1      | 3      | 1      | 5      | 3      | 5      |
| CC 14       | 6     | 1     | 1      | 1      | 6      | 1      | 1      | 1      | 1      |
| CC 15       | 6     | 3     | 4      | 6      | 4      | 1      | 1      | 1      | 1      |
| Mean        | 5,9   | 2,5   | 2,1    | 2,4    | 2,6    | 2,0    | 1,9    | 2,2    | 1,9    |

#### 4. Puff topography

Acute craving at the different time points are listed in Tables S7 (for the pod e-cigarette group), S8 (for the HTP group), and S9 (for the conventional cigarette group).

**Table S7.** Puff topography in the pod e-cigarette group.

| Participant  | Median Mouth time (sec) | Median Inhalation time (sec) | Median Exhalation time (sec) | puffs | Single puff | Short cluster | Medium cluster | Long cluster |
|--------------|-------------------------|------------------------------|------------------------------|-------|-------------|---------------|----------------|--------------|
| Pod e-cig 1  | 02,962                  | 04,765                       | 01,459                       | 52    | 1           | 16            | 1              | 0            |
| Pod e-cig 2  | 02,629                  | 01,040                       | 01,742                       | 124   | 7           | 9             | 4              | 4            |
| Pod e-cig 3  | 02,980                  | 01,000                       | 01,180                       | 50    | 6           | 13            | 2              | 0            |
| Pod e-cig 4  | 02,733                  | 01,567                       | 02,467                       | 30    | 19          | 4             | 0              | 0            |
| Pod e-cig 5  | 04,254                  | 02,068                       | 02,254                       | 59    | 24          | 8             | 1              | 1            |
| Pod e-cig 6  | 04,333                  | 05,296                       | 01,296                       | 27    | 21          | 3             | 0              | 0            |
| Pod e-cig 7  | 03,661                  | 01,964                       | 01,384                       | 112   | 8           | 6             | 1              | 4            |
| Pod e-cig 8  | 02,773                  | 02,443                       | 01,216                       | 88    | 9           | 10            | 6              | 0            |
| Pod e-cig 9  | 01,747                  | 02,316                       | 01,924                       | 83    | 10          | 10            | 2              | 1            |
| Pod e-cig 10 | 01,209                  | 02,364                       | 01,209                       | 110   | 2           | 12            | 3              | 3            |
| Pod e-cig 11 | 03,489                  | 05,378                       | 01,356                       | 45    | 12          | 10            | 1              | 0            |
| Pod e-cig 12 | 01,655                  | 01,500                       | 01,338                       | 148   | 0           | 1             | 2              | 7            |
| Pod e-cig 13 | 02,902                  | 01,000                       | 01,024                       | 41    | 11          | 10            | 0              | 0            |
| Pod e-cig 14 | 01,714                  | 02,490                       | 01,837                       | 49    | 18          | 13            | 0              | 0            |
| Pod e-cig 15 | 02,820                  | 01,033                       | 01,115                       | 61    | 14          | 10            | 3              | 0            |

**Table S8.** Puff topography in the HTP group.

| Participant | Median Mouth time (sec) | Median Inhalation time (sec) | Median Exhalation time (sec) | puffs | Single puff | Short cluster | Medium cluster | Long cluster |
|-------------|-------------------------|------------------------------|------------------------------|-------|-------------|---------------|----------------|--------------|
| HTP 1       | 02,200                  | 02,133                       | 01,800                       | 15    | 2           | 3             | 1              | 0            |
| HTP 2       | 01,667                  | 01,475                       | 02,146                       | 39    | 0           | 0             | 0              | 3            |
| HTP 3       | 02,053                  | 02,421                       | 01,474                       | 19    | 0           | 4             | 1              | 0            |
| HTP 4       | 01,625                  | 01,000                       | 01,000                       | 32    | 2           | 7             | 1              | 0            |
| HTP 5       | 01,535                  | 01,105                       | 01,098                       | 43    | 0           | 0             | 0              | 3            |
| HTP 6       | 01,829                  | 02,329                       | 01,284                       | 70    | 0           | 0             | 0              | 5            |
| HTP 7       | 01,429                  | 01,557                       | 01,029                       | 70    | 0           | 0             | 0              | 4            |
| HTP 8       | 01,987                  | 01,382                       | 03,079                       | 75    | 0           | 1             | 2              | 4            |
| HTP 9       | 02,875                  | 01,325                       | 01,088                       | 80    | 0           | 1             | 0              | 5            |
| HTP 10      | 01,386                  | 01,025                       | 01,012                       | 83    | 1           | 1             | 1              | 5            |
| HTP 11      | 01,088                  | 01,088                       | 01,000                       | 34    | 6           | 4             | 1              | 1            |
| HTP 12      | 01,952                  | 01,345                       | 01,631                       | 84    | 1           | 2             | 3              | 4            |
| HTP 13      | 01,320                  | 01,000                       | 01,000                       | 25    | 4           | 2             | 2              | 0            |
| HTP 14      | 02,327                  | 03,538                       | 01,731                       | 52    | 0           | 2             | 2              | 2            |
| HTP 15      | 02,532                  | 02,274                       | 01,935                       | 62    | 0           | 2             | 4              | 2            |

**Table S9.** Puff topography in the CC group.

| Participant | Median Mouth time (sec) | Median Inhalation time (sec) | Median Exhalation time (sec) | puffs | Single puff | Short cluster | Medium cluster | Long cluster |
|-------------|-------------------------|------------------------------|------------------------------|-------|-------------|---------------|----------------|--------------|
| CC 1        | 02,145                  | 03,691                       | 01,911                       | 55    | 0           | 0             | 2              | 3            |
| CC 2        | 01,551                  | 01,286                       | 01,061                       | 49    | 1           | 0             | 0              | 3            |
| CC 3        | 01,824                  | 01,939                       | 02,353                       | 34    | 3           | 10            | 1              | 0            |
| CC 4        | 01,516                  | 02,129                       | 01,281                       | 31    | 0           | 0             | 1              | 2            |
| CC 5        | 02,350                  | 02,075                       | 01,200                       | 40    | 0           | 4             | 1              | 2            |
| CC 6        | 01,826                  | 02,543                       | 01,261                       | 46    | 0           | 0             | 4              | 1            |
| CC 7        | 01,385                  | 02,897                       | 01,538                       | 39    | 10          | 10            | 0              | 0            |
| CC 8        | 01,686                  | 02,400                       | 01,057                       | 35    | 0           | 0             | 3              | 0            |
| CC 9        | 01,789                  | 02,605                       | 01,368                       | 38    | 0           | 0             | 4              | 0            |
| CC 10       | 02,568                  | 03,973                       | 01,351                       | 37    | 0           | 2             | 2              | 0            |
| CC 11       | 01,667                  | 01,771                       | 01,250                       | 48    | 0           | 0             | 0              | 4            |
| CC 12       | 01,449                  | 02,265                       | 01,408                       | 49    | 0           | 2             | 4              | 1            |
| CC 13       | 01,176                  | 01,157                       | 01,000                       | 51    | 1           | 1             | 0              | 3            |
| CC 14       | 02,125                  | 03,312                       | 01,042                       | 48    | 2           | 11            | 2              | 0            |
| CC 15       | 01,743                  | 01,914                       | 01,200                       | 35    | 0           | 4             | 2              | 0            |

## 5. Side effects

Cardiovascular side effects are displayed in Figure S1. Other inquired side effects were recorded at baseline, at 30 min and at 90 min, as shown in Figure S2.

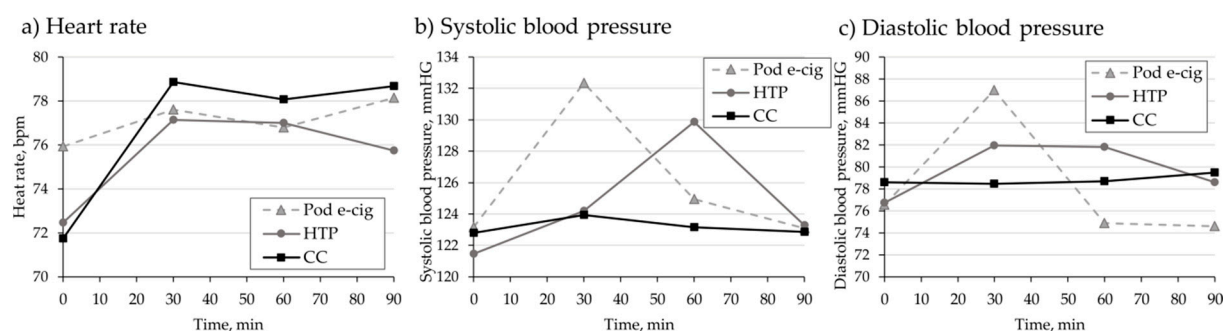

**Figure S1.** Changes in (a) heart rate, (b) systolic blood pressure, and (c) diastolic blood pressure in the three study groups: e-cigarette (pod e-cig) group, heated tobacco products (HTP) group, and conventional cigarette (CC) group. Results are presented as means.

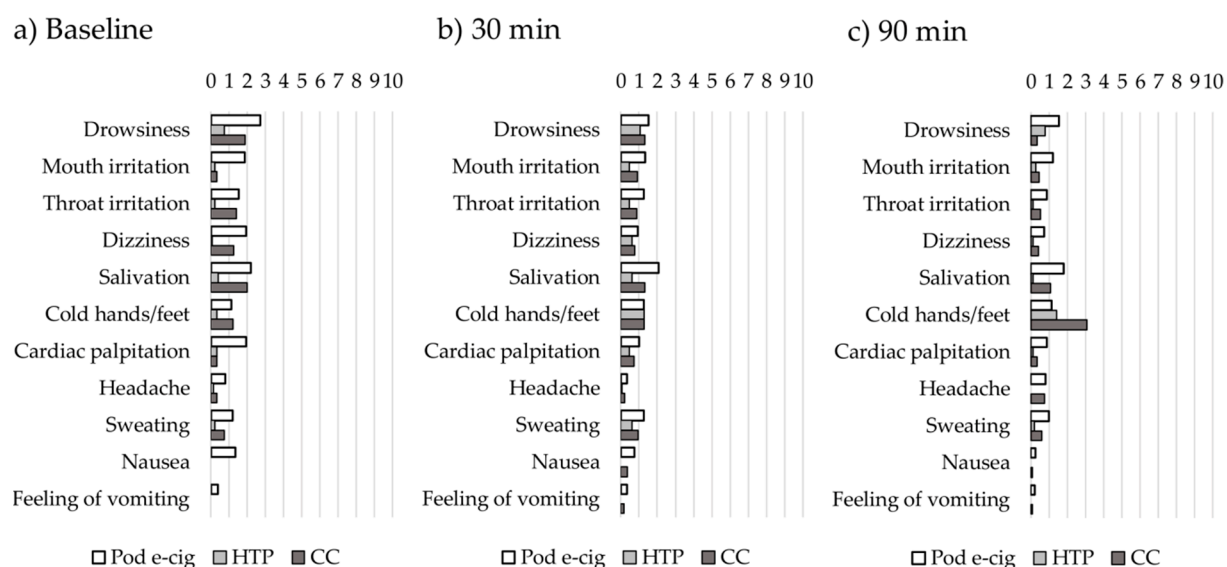

**Figure S2.** Side effects reported at (a) baseline, (b) 5 min or (c) 30 min on a visual analog scale (VAS) ranging from 0 (no effect) to 10 (strong effect) in the three study groups: e-cigarette (pod e-cig) group, heated tobacco products (HTP) group, and conventional cigarette (CC) group. Results are presented as means.
